# Supplementary material
Source: PubMed Central journal article supplement (PMC2832379)
Supplement: supp_76_5_1334__1.pdf [file supp_76_5_1334__1.pdf]

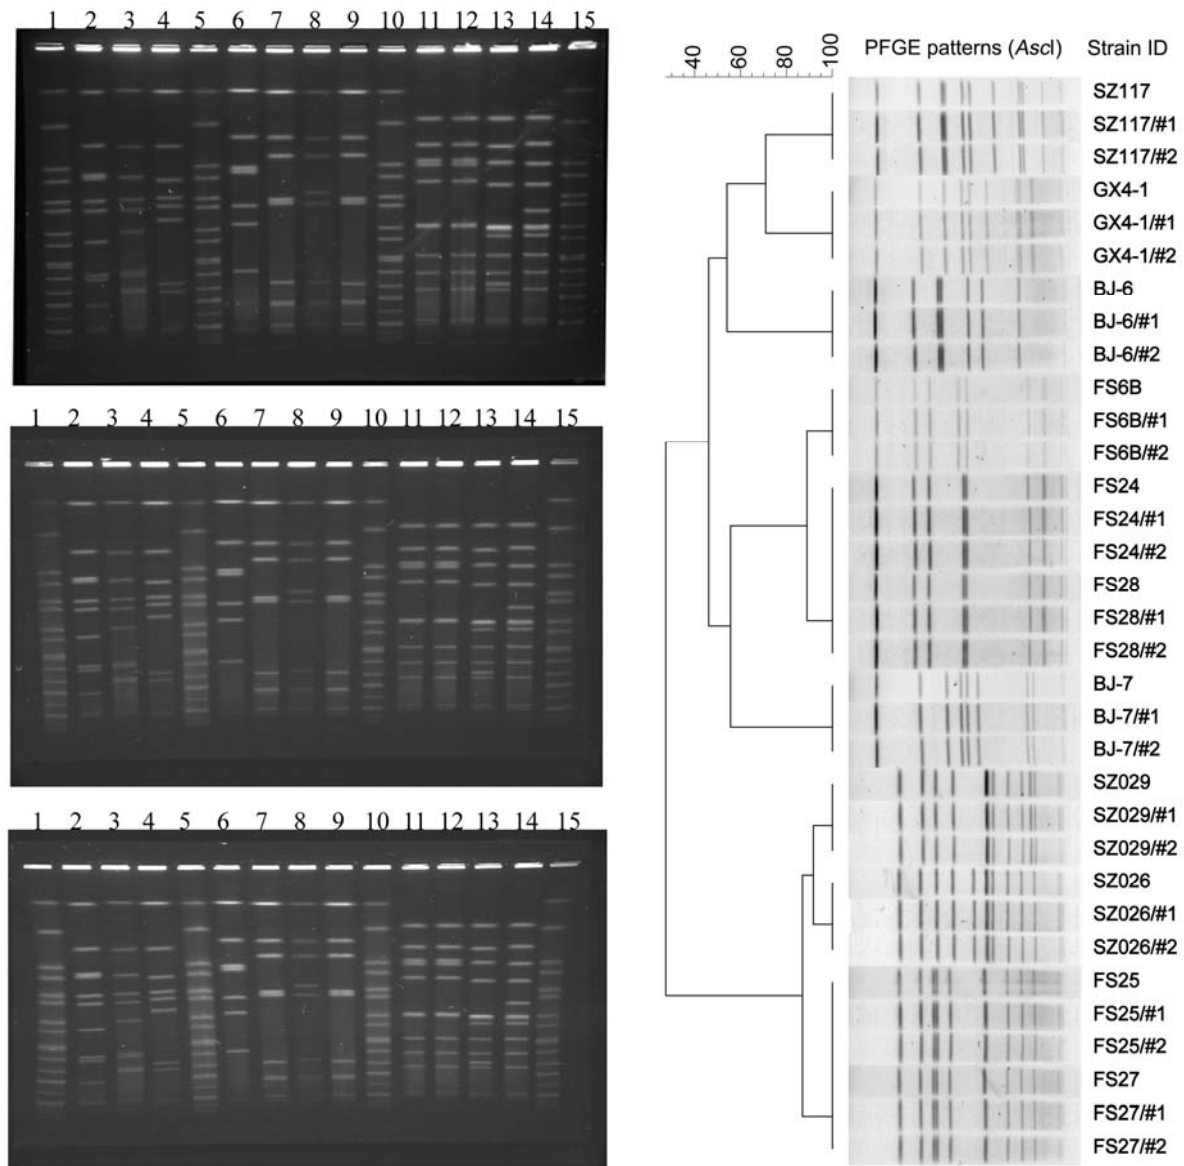

Fig. S1. PFGE patterns and clustering result of *AscI* restriction fragments of *L. pneumophila* DNA from 11 strains for reproducibility evaluation.
